# Supplementary material for: Aging Resistance of Biocomposites Crosslinked with Silica and Quercetin
Source: MDPI journal article supplement (doi:10.3390/ijms221910894), 2021-10-08
Supplement: s1 [file s1]

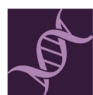

Supplementary Material

## Aging resistance of biocomposites crosslinked with combination of silica and quercetin

Anna Masek <sup>1\*</sup> and Olga Olejnik <sup>1</sup>

<sup>1</sup> Lodz University of Technology, Faculty of Chemistry, Institute of Polymer and Dye Technology,  
ul. Stefanowskiego 12/16, 90-924 Lodz, Poland

\* Correspondence: anna.masek@p.lodz.pl

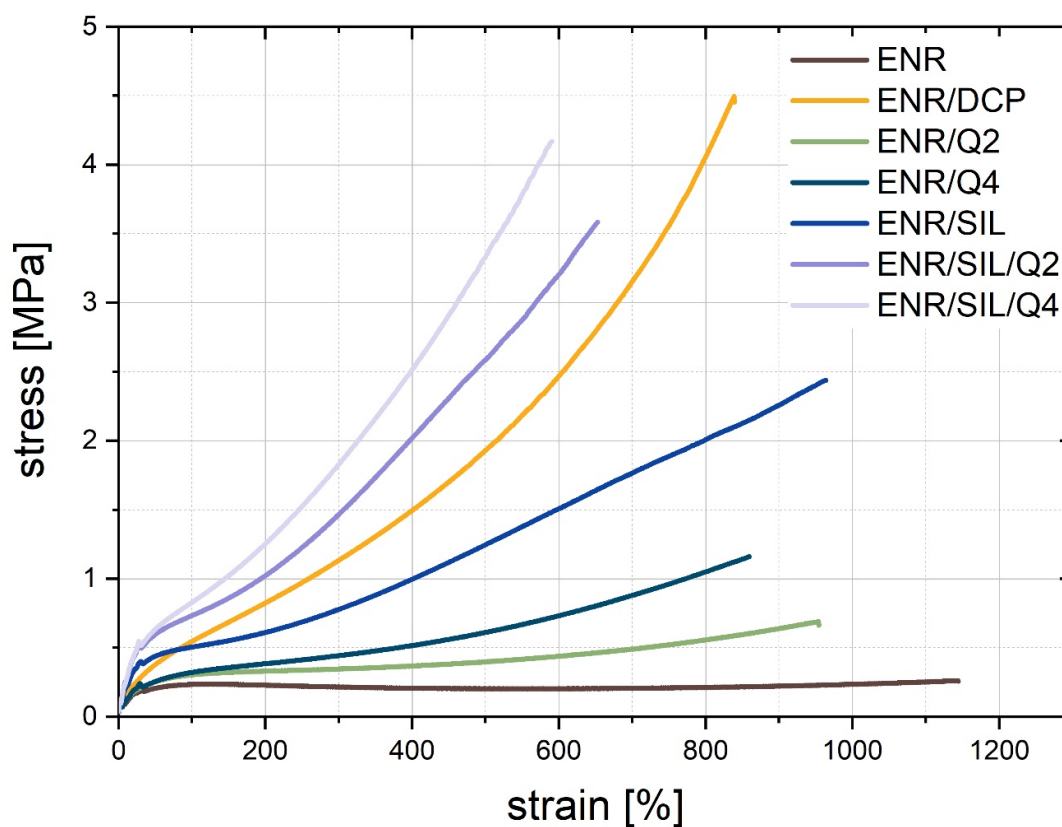

Figure S1. The strain-stress curves of tested ENR-based composites.

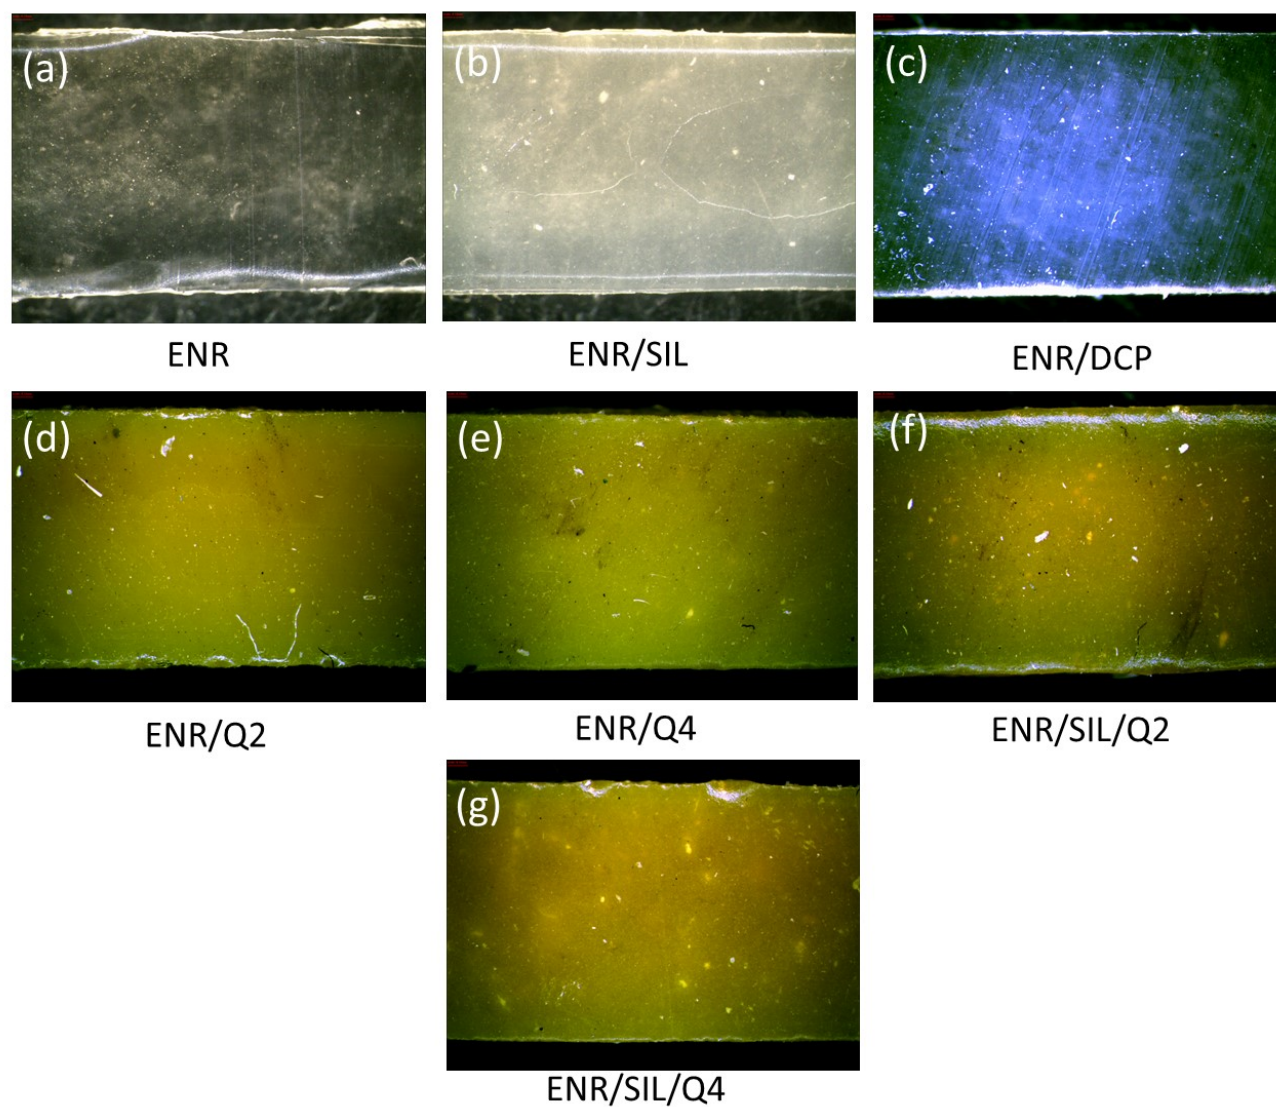

**Figure S2.** Microscope images of ENR-based composites: (a) pure uncurried ENR, (b) ENR cured with 15 phr of silica, (c) ENR cured with dicumyl peroxide (DCP), (d) ENR cured with 2 phr of quercetin, (e) ENR cured with 4 phr of quercetin, (f) ENR cured with 2 phr of quercetin and 15 phr of silica, (g) ENR cured with 4 phr of quercetin and 15 phr of silica.

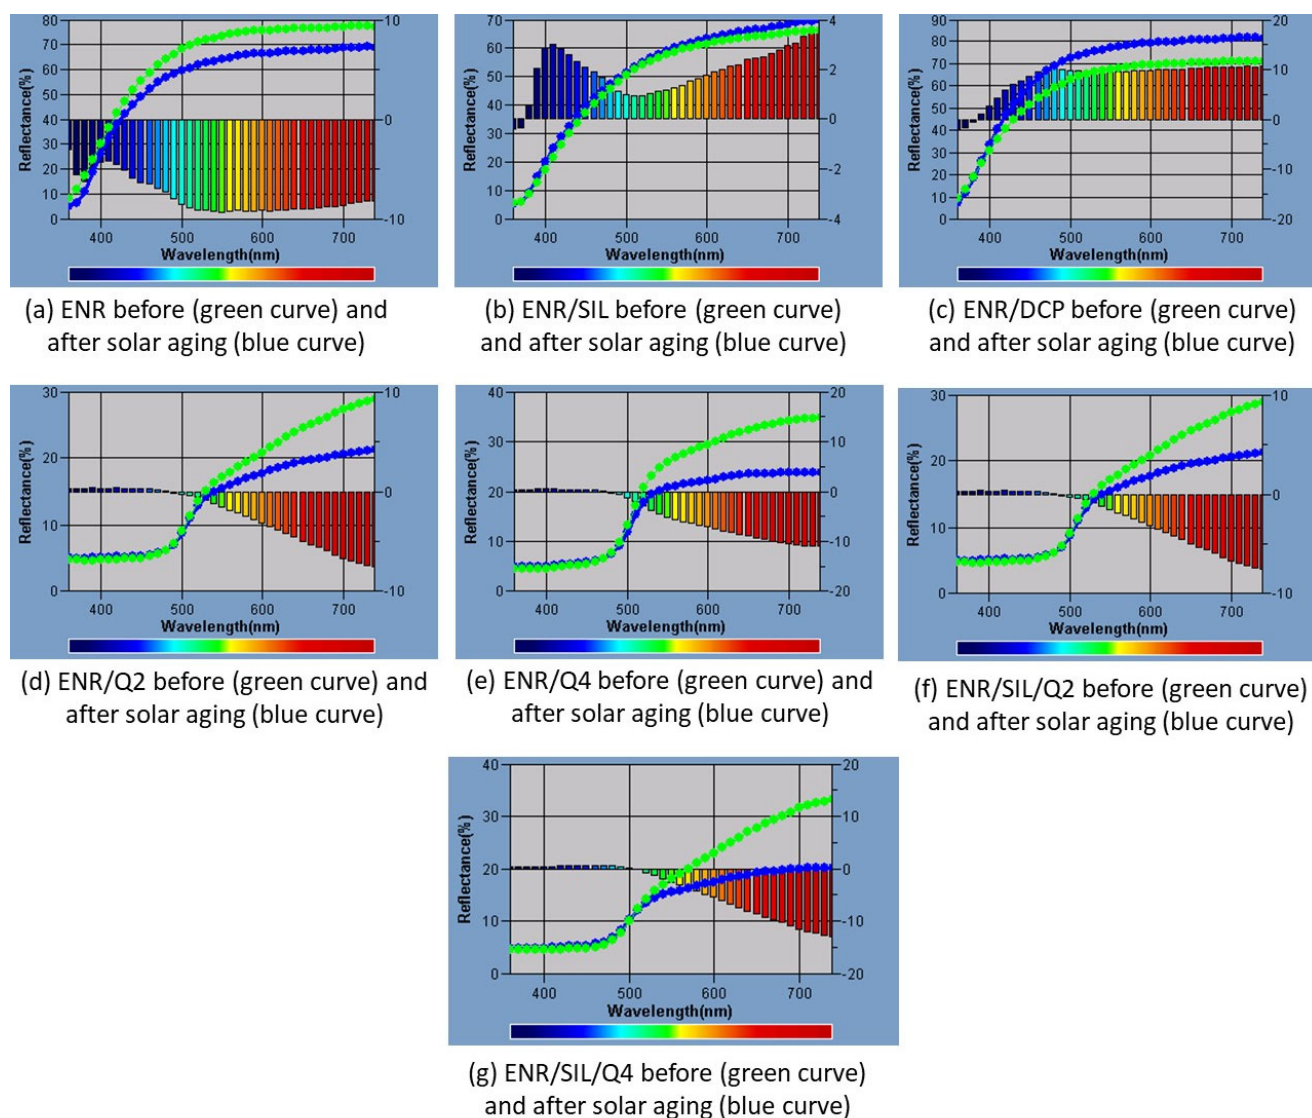

**Figure S3.** UV-VIS spectra of ENR-based composites before (green curve) and after solar aging (blue curve): (a) pure uncured ENR, (b) ENR cured with 15 phr of silica, (c) ENR cured with dicumyl peroxide (DCP), (d) ENR cured with 2 phr of quercetin, (e) ENR cured with 4 phr of quercetin, (f) ENR cured with 2 phr of quercetin and 15 phr of silica, (g) ENR cured with 4 phr of quercetin and 15 phr of silica.
